# Supplementary material for: Inositol Derivatives and Phenolic Compounds from the Roots of Taraxacum coreanum
Source: PubMed Central journal article supplement (PMC6152297; doi:10.3390/molecules22081349), 2017-08-14
Supplement: molecules-22-01349-s001.pdf [file molecules-22-01349-s001.pdf]

## Supplementary material

# Inositol Derivatives and Phenolic Compounds from the Roots of *Taraxacum coreanum*

Eun Jin Mo, Jong Hoon Ahn, Yang Hee Jo, Seon Beom Kim, Bang Yeon Hwang and Mi Kyeong Lee\*

College of Pharmacy, Chungbuk National University, Cheongju, Chungbuk 28160, Korea; [mej2403@nate.com](mailto:mej2403@nate.com) (E.J.M.); [zzonggoo07@naver.com](mailto:zzonggoo07@naver.com) (J.H.A.); [qow0125@naver.com](mailto:qow0125@naver.com) (Y.H.J.); [suntiger85@hanmail.net](mailto:suntiger85@hanmail.net) (S.B.K.); [byhwang@chungbuk.ac.kr](mailto:byhwang@chungbuk.ac.kr) (B.Y.H.)

\* Correspondence: [mkleee@chungbuk.ac.kr](mailto:mkleee@chungbuk.ac.kr); Tel.: +82-43-261-2818

**Table S1.**  $^1\text{H}$  and  $^{13}\text{C}$  NMR spectroscopic data for compound **3**

| Carbon No        | <b>3</b>                         |                 |
|------------------|----------------------------------|-----------------|
|                  | $^1\text{H}$                     | $^{13}\text{C}$ |
| 1, 4             | 5.08 (2H, dt, $J = 7.5, 2.0$ Hz) | 74.2            |
| 2, 5             | 3.88 (2H, dd, $J = 7.0, 3.0$ Hz) | 71.1            |
| 3, 6             | 4.03 (2H, d, $J = 2.0$ Hz)       | 69.9            |
| 1', 1''          | -                                | 125.7           |
| 2', 6', 2'', 6'' | 7.14 (4H, d, $J = 8.5$ Hz)       | 130.1           |
| 3', 5', 3'', 5'' | 6.74 (4H, d, $J = 8.5$ Hz)       | 114.8           |
| 4', 4''          | -                                | 156.1           |
| 7', 7''          | 3.65 (4H, s)                     | 39.5            |
| 8', 8''          | -                                | 172.5           |

**Table S2.** <sup>1</sup>H spectroscopic data for compounds **4-6**

| Carbon No  | <b>4</b>                               | <b>5</b>                               | <b>6</b>                               |
|------------|----------------------------------------|----------------------------------------|----------------------------------------|
| 1          | 4.82 (1H, dd, <i>J</i> = 10.5, 3.5 Hz) | 4.04 (1H, t, <i>J</i> = 3.5 Hz)        | 5.28 (1H, t, <i>J</i> = 3.5 Hz)        |
| 2          | 3.83 (1H, t, <i>J</i> = 9.5 Hz)        | 5.13 (1H, dd, <i>J</i> = 10.5, 3.0)    | 5.15 (1H, dd, <i>J</i> = 10.5, 3.0 Hz) |
| 3          | 3.57 (1H, t, <i>J</i> = 9.5 Hz)        | 5.33 (1H, t, <i>J</i> = 9.5 Hz)        | 5.25 (1H, t, <i>J</i> = 10.0 Hz)       |
| 4          | 3.92 (1H, dd, <i>J</i> = 10.0, 3.5 Hz) | 3.76 (1H, t, <i>J</i> = 9.5 Hz)        | 3.80 (1H, t, <i>J</i> = 10.0 Hz)       |
| 5          | 5.15 (1H, t, <i>J</i> = 4.0 Hz)        | 3.81 (1H, dd, <i>J</i> = 10.0, 3.0 Hz) | 3.62 (1H, dd, <i>J</i> = 10.0, 3.0 Hz) |
| 6          | 3.99 (1H, t, <i>J</i> = 4.0 Hz)        | 3.94 (1H, t, <i>J</i> = 3.5 Hz)        | 3.84 (1H, t, <i>J</i> = 3.5 Hz)        |
| 2', 6'     | 7.12 (2H, d, <i>J</i> = 8.5 Hz)        | 7.04 (2H, d, <i>J</i> = 8.5 Hz)        | 6.85 (2H, d, <i>J</i> = 8.0 Hz)        |
| 2'', 6''   | 7.14 (2H, d, <i>J</i> = 8.5 Hz)        | 7.07 (2H, d, <i>J</i> = 8.5 Hz)        | 7.10 (2H, d, <i>J</i> = 8.5 Hz),       |
| 2''', 6''' | -                                      | -                                      | 7.14 (2H, d, <i>J</i> = 8.5 Hz)        |
| 3', 5'     | 6.75 (2H, d, <i>J</i> = 9.0 Hz)        | 6.73 (4H, d, <i>J</i> = 8.5 Hz)        | 6.69 (2H, d, <i>J</i> = 8.5 Hz)        |
| 3'', 5''   | 6.73 (2H, d, <i>J</i> = 8.5 Hz)        | -                                      | 6.75 (2H, d, <i>J</i> = 8.0 Hz)        |
| 3''', 5''' | -                                      | -                                      | 6.77 (2H, d, <i>J</i> = 8.5 Hz)        |
| 7'         | 3.65 (2H, m)                           | 3.37 (4H, s)                           | 3.50 (1H, s), 3.48 (1H, s)             |
| 7''        | 3.61 (2H, m),                          | -                                      | 3.44 (2H, d, <i>J</i> = 2.5 Hz)        |
| 7'''       | -                                      | -                                      | 2.86-2.96 (2H, m)                      |

Recorded at 500MHz in CD<sub>3</sub>OD.

**Table S3.** <sup>1</sup>H spectroscopic data for compounds 7-12

| Carbon No         | 7 <sup>a</sup>                  | 8 <sup>b</sup>                  | 9 <sup>a</sup> | 10 <sup>a</sup>                 | 11 <sup>b</sup>                 | 12 <sup>b</sup>                 |
|-------------------|---------------------------------|---------------------------------|----------------|---------------------------------|---------------------------------|---------------------------------|
| 1                 | -                               | -                               | -              | -                               | -                               | -                               |
| 2                 | 7.79 (1H, d, <i>J</i> = 8.0 Hz) | 7.44 (1H, m)                    | 7.25 (1H, s)   | 7.43 (1H, m)                    | 6.96 (1H, d, <i>J</i> = 8.5 Hz) | 7.09 (1H, d, <i>J</i> = 8.5 Hz) |
| 3                 | 6.93 (1H, d, <i>J</i> = 8.4 Hz) | -                               | -              | -                               | 6.84 (1H, d, <i>J</i> = 8.5 Hz) | 6.74 (1H, d, <i>J</i> = 8.5 Hz) |
| 4                 | -                               | -                               | -              | -                               | -                               | -                               |
| 5                 | 6.93 (1H, d, <i>J</i> = 8.4 Hz) | 6.95 (1H, d, <i>J</i> = 8.5 Hz) | -              | 6.81 (1H, d, <i>J</i> = 8.8 Hz) | 6.84 (1H, d, <i>J</i> = 8.5 Hz) | 6.74 (1H, d, <i>J</i> = 8.5 Hz) |
| 6                 | 7.79 (1H, d, <i>J</i> = 8.0 Hz) | 7.44 (1H, m)                    | 7.25 (1H, s)   | 7.43 (1H, m)                    | 6.96 (1H, d, <i>J</i> = 8.5 Hz) | 7.09 (1H, d, <i>J</i> = 8.5 Hz) |
| 7                 | 9.78 (1H, s)                    | 9.75 (1H, s)                    | 9.76 (1H, s)   | -                               | 3.49 (2H, s)                    | 3.54 (2H, s)                    |
| 8                 |                                 |                                 |                |                                 | -                               | -                               |
| -OCH <sub>3</sub> |                                 | 3.94 (3H, s)                    | 3.94 (6H, s)   | 3.84 (3H, s)                    | 3.74 (3H, s)                    | 3.68 (3H, s)                    |

<sup>a</sup> Recorded at 400MHz in CD<sub>3</sub>OD, <sup>b</sup> Recorded at 500MHz in CD<sub>3</sub>OD.

**Table S4.** <sup>1</sup>H spectroscopic data for compounds **13-15**

| Carbon No         | <b>13<sup>a</sup></b>                | <b>14<sup>a</sup></b>                 | <b>15<sup>b</sup></b>                 |
|-------------------|--------------------------------------|---------------------------------------|---------------------------------------|
| 1                 | -                                    | -                                     | -                                     |
| 2                 | 7.57 (1H, d, <i>J</i> = 2.0 Hz)      | 7.05 (1H, d, <i>J</i> = 2.0 Hz)       | 6.79 (1H, d, <i>J</i> = 2.0 Hz)       |
| 3                 | -                                    | -                                     | -                                     |
| 4                 | -                                    | -                                     | -                                     |
| 5                 | 6.89 (1H, d, <i>J</i> = 8.4 Hz)      | 6.79 (1H, d, <i>J</i> = 8.0 Hz)       | 6.71 (1H, d, <i>J</i> = 8.0 Hz)       |
| 6                 | 7.60 (1H, d, <i>J</i> = 8.4, 2.0 Hz) | 6.96 (1H, dd, <i>J</i> = 8.0, 2.0 Hz) | 6.64 (1H, dd, <i>J</i> = 8.0, 2.0 Hz) |
| 7                 | -                                    | 7.56 (1H, d, <i>J</i> = 16.0 Hz)      | 2.61 (2H, t, <i>J</i> = 7.5 Hz)       |
| 8                 | 3.18 (2H, t, <i>J</i> = 6.4 Hz)      | 6.28 (1H, d, <i>J</i> = 16.0 Hz)      | 1.82 (2H, m)                          |
| 9                 | 3.96 (2H, t, <i>J</i> = 6.4 Hz)      | -                                     | 3.57 (2H, t, <i>J</i> = 6.5 Hz)       |
| -OCH <sub>3</sub> | 3.93 (3H, s)                         | 3.77 (3H, s)                          | 3.80 (3H, s)                          |

<sup>a</sup> Recorded at 400MHz in CD<sub>3</sub>OD, <sup>b</sup> Recorded at 500MHz in CD<sub>3</sub>OD.

**Table S5.** <sup>1</sup>H spectroscopic data for compounds **17** and **18**

| Carbon No | <b>17</b>                       | <b>18</b>                              |
|-----------|---------------------------------|----------------------------------------|
| 3         | 6.21 (1H, d, <i>J</i> = 9.6 Hz) | 6.22 (1H, d, <i>J</i> = 9.2 Hz)        |
| 4         | 7.87 (1H, d, <i>J</i> = 9.6 Hz) | 7.85 (1H, d, <i>J</i> = 9.2 Hz)        |
| 5         | 7.42 (1H, s)                    | 7.37 (1H, s)                           |
| 8         | 6.74 (1H, s)                    | 6.72 (1H, s)                           |
| 2'        | 4.78 (1H, t, <i>J</i> = 8.4 Hz) |                                        |
| 3'        | 3.27 (2H, m)                    | 3.83 (1H, q, <i>J</i> = 6.8 Hz)        |
| 4'        |                                 | 3.12 (1H, dd, <i>J</i> = 16.8, 5.2 Hz) |
|           |                                 | 2.81 (1H, dd, <i>J</i> = 16.8, 6.8 Hz) |
| 5'        | 1.31 (3H, s)                    | 1.38 (3H, s)                           |
| 6'        | 1.25 (3H, s)                    | 1.34 (3H, s)                           |

Recorded at 400MHz in CD<sub>3</sub>OD.

**Table S6.** <sup>1</sup>H spectroscopic data for compounds **19** and **20**

| Carbon<br>No      | <b>19</b>                              | <b>20</b>                              |
|-------------------|----------------------------------------|----------------------------------------|
| 3                 | 6.30 (1H, d, <i>J</i> = 10.0 Hz)       | 6.30 (1H, d, <i>J</i> = 10.0 Hz)       |
| 4                 | 8.44 (1H, d, <i>J</i> = 9.6 Hz)        | 8.24 (1H, d, <i>J</i> = 10.0 Hz)       |
| 8                 | 7.21 (1H, s)                           |                                        |
| 2'                | 7.80 (1H, d, <i>J</i> = 2.4 Hz)        | 7.84 (1H, d, <i>J</i> = 2.4 Hz)        |
| 3'                | 7.24 (1H, d, <i>J</i> = 2.4 Hz)        | 7.23 (1H, d, <i>J</i> = 2.4 Hz)        |
| 1''               | 4.81 (1H, dd, <i>J</i> = 10.0, 2.4 Hz) | 4.58 (1H, dd, <i>J</i> = 10.4, 2.8 Hz) |
|                   | 4.41 (1H, q, <i>J</i> = 9.6 Hz)        | 4.30 (1H, q, <i>J</i> = 10.4, 8.0 Hz)  |
| 2''               | 3.84 (1H, dd, <i>J</i> = 8.8, 2.8 Hz)  | 3.85 (1H, dd, <i>J</i> = 8.0, 2.8 Hz)  |
| 4''               | 1.31 (3H, s)                           | 1.28 (3H, s)                           |
| 5''               | 1.26 (3H, s)                           | 1.24 (3H, s)                           |
| -OCH <sub>3</sub> |                                        | 4.22 (3H, s)                           |

Recorded at 400MHz in CD<sub>3</sub>OD.

**Table S7.** <sup>1</sup>H spectroscopic data for compounds **21 - 23**

| Carbon No              | <b>21</b>                              | Carbon No             | <b>22</b>                       | <b>23</b>                             |
|------------------------|----------------------------------------|-----------------------|---------------------------------|---------------------------------------|
| 2, 6                   | 6.74 (2H, s)                           | 2, 2'                 | 6.68 (2H, s)                    | 6.97 (2H, d, <i>J</i> = 1.6 Hz)       |
| 7                      | 4.79 (1H, d, <i>J</i> = 4.0 Hz)        | 5, 5'                 | -                               | 6.79 (2H, d, <i>J</i> = 8.0 Hz)       |
| 8                      | 3.15 (1H, m)                           | 6, 6'                 | 6.68 (2H, s)                    | 6.84 (2H, dd, <i>J</i> = 8.4, 1.6 Hz) |
| 9                      | 3.93 (2H, dd, <i>J</i> = 9.2, 3.2 Hz)  | 7, 7'                 | 4.74 (2H, d, <i>J</i> = 4.4 Hz) | 4.73 (2H, d, <i>J</i> = 4.4 Hz)       |
| 2', 6'                 | 6.68 (2H, s)                           | 8, 8'                 | 3.17 (1H, m)                    | 3.17 (1H, m)                          |
| 7'                     | 4.74 (1H, d, <i>J</i> = 4.4 Hz)        | 9, 9'                 | 3.90 (2H, m)                    | 3.86 (2H, m), 4.25 (2H, m)            |
| 8'                     | 3.15 (1H, m)                           |                       | 4.29 (2H, m)                    |                                       |
| 9'                     | 4.30 (2H, m)                           | 3,3'-OCH <sub>3</sub> | 3.87 (6H, s)                    | 3.88 (6H, s)                          |
| 1''                    | 4.80 (1H, s)                           | 5,5'-OCH <sub>3</sub> | 3.87 (6H, s)                    | -                                     |
| 2''                    | 3.50 (1H, m)                           |                       |                                 |                                       |
| 3''                    | 3.42 (1H, d, <i>J</i> = 2.8 Hz)        |                       |                                 |                                       |
| 4''                    | 3.44 (1H, d, <i>J</i> = 2.8 Hz)        |                       |                                 |                                       |
| 5''                    | 3.22 (1H, m)                           |                       |                                 |                                       |
| 6''                    | 3.80 (1H, dd, <i>J</i> = 12.0, 2.4 Hz) |                       |                                 |                                       |
|                        | 3.68 (1H, dd, <i>J</i> = 12.0, 5.2 Hz) |                       |                                 |                                       |
| 3,5-OCH <sub>3</sub>   | 3.88 (6H, s)                           |                       |                                 |                                       |
| 3',5'-OCH <sub>3</sub> | 3.86 (6H, s)                           |                       |                                 |                                       |

Recorded at 400MHz in CD<sub>3</sub>OD.

**Table S8.** Antioxidant activity of compounds **1-23**.

| Compounds | IC <sub>50</sub> (μM) | Compounds              | IC <sub>50</sub> (μM) |
|-----------|-----------------------|------------------------|-----------------------|
| <b>1</b>  | >100                  | <b>13</b>              | >100                  |
| <b>2</b>  | >100                  | <b>14</b>              | 34.6                  |
| <b>3</b>  | >100                  | <b>15</b>              | >100                  |
| <b>4</b>  | >100                  | <b>16</b>              | >100                  |
| <b>5</b>  | >100                  | <b>17</b>              | >100                  |
| <b>6</b>  | >100                  | <b>18</b>              | >100                  |
| <b>7</b>  | >100                  | <b>19</b>              | >100                  |
| <b>8</b>  | >100                  | <b>20</b>              | >100                  |
| <b>9</b>  | >100                  | <b>21</b>              | 81.6                  |
| <b>10</b> | 30.4                  | <b>22</b>              | 75.4                  |
| <b>11</b> | >100                  | <b>23</b>              | 89.2                  |
| <b>12</b> | >100                  | quercetin <sup>a</sup> | 19.8                  |

<sup>a</sup>Quercetin was used as the positive control.
